# Supplementary material
Source: publisher figshare collection journal article supplement (https://frontiersin.figshare.com/ndownloader/files/23716319)
Supplement: Supplementary file [file 23716319]

## Supplementary Material

### 1 Supplementary Tables

**TABLE 1 |** Baseline characteristics and outcomes were compared between included and excluded groups.

| Characteristics                                      | Included Group<br>(n=135) | Excluded Group<br>(n=10) | P Value |
|------------------------------------------------------|---------------------------|--------------------------|---------|
| Age, mean $\pm$ SD, year                             | 62.2 $\pm$ 12.6           | 63.8 $\pm$ 8.2           | 0.222   |
| Male, n (%)                                          | 91 (68.1)                 | 6 (60.0)                 | 0.728   |
| Risk factors                                         |                           |                          |         |
| Hypertension, n (%)                                  | 85 (68.0)                 | 7 (70.0)                 | 1.000   |
| Hyperlipidaemia, n (%)                               | 61 (45.2)                 | 5 (50.0)                 | 1.000   |
| Diabetes, n (%)                                      | 37 (27.4)                 | 4 (40.0)                 | 0.469   |
| Smoking, n (%)                                       | 39 (28.9)                 | 2 (20.0)                 | 0.725   |
| History of ischemic stroke, n (%)                    | 18 (13.3)                 | 1 (10.0)                 | 1.000   |
| Blood pressure at admission                          |                           |                          |         |
| SBP, mean $\pm$ SD, mmHg                             | 153.4 $\pm$ 22.5          | 152.0 $\pm$ 19.1         | 0.551   |
| DBP, median (IQR), mmHg                              | 85 (76, 99)               | 79 (73, 95)              | 0.525   |
| Baseline blood glucose, median (IQR), mmol/L         | 5.6 (5.0, 7.0)            | 6.1 (5.4, 9.8)           | 0.224   |
| Onset-to-needle time, median (IQR), hours            | 3 (2, 4)                  | 3 (3, 4)                 | 0.620   |
| Baseline NIHSS score, median (IQR)                   | 5 (3, 7)                  | 5 (4, 7)                 | 0.844   |
| NIHSS score at discharge, median (IQR)               | 3 (2, 6)                  | 4 (2, 5)                 | 0.726   |
| Hospital stay, median (IQR), days                    | 10 (8, 13)                | 11 (9, 13)               | 0.879   |
| Infarct site                                         |                           |                          |         |
| The lenticulostriate artery, n (%)                   | 96 (71.1)                 | 8 (80.0)                 | 0.725   |
| The paramedian pontine artery, n (%)                 | 39 (28.9)                 | 2 (20.0)                 | 0.725   |
| Intravenous thrombolysis, n (%)                      | 51 (37.8)                 | 3 (30.0)                 | 0.744   |
| Dual-antiplatelet treatment, n (%)                   | 129 (95.6)                | 9 (90.0)                 | 0.400   |
| Early neurological deterioration, n (%) <sup>‡</sup> | 35 (25.9)                 | 3 (30.0)                 | 0.722   |
| mRS scores at 3 months, median, IQR                  | 1 (0, 2)                  | 2 (0, 3)                 | 0.746   |

Abbreviations: SD, standard deviation; IQR, interquartile range; NIHSS, National Institutes of Health Stroke Scale; mRS, Modified Rankin Scale score; SBP, systolic blood pressure; DBP, diastolic blood pressure.

**TABLE 2** | Baseline characteristics and outcomes were compared between END and non-END groups.

| Characteristics                              | END Group<br>(n=35) | Non-END Group<br>(n=100) | P Value |
|----------------------------------------------|---------------------|--------------------------|---------|
| Age, median, IQR, year                       | 62 (56, 67)         | 62 (52, 72)              | 0.918   |
| Male, n (%)                                  | 24 (68.8)           | 68 (68.0)                | 0.950   |
| Risk factors                                 |                     |                          |         |
| Hypertension, n (%)                          | 22 (62.9)           | 63 (63.0)                | 0.988   |
| Hyperlipidaemia, n (%)                       | 19 (54.3)           | 42(42.0)                 | 0.209   |
| Diabetes, n (%)                              | 12 (34.3)           | 25(25.0)                 | 0.289   |
| Smoking, n (%)                               | 7 (20.0)            | 32 (32.0)                | 0.178   |
| History of ischemic stroke, n (%)            | 6 (17.1)            | 12 (12.0)                | 0.441   |
| Blood pressure at admission                  |                     |                          |         |
| SBP, mean $\pm$ SD, mmHg                     | 158.7 $\pm$ 18.3    | 151.6 $\pm$ 23.7         | 0.223   |
| DBP, median (IQR), mmHg                      | 85 (78, 99)         | 85 (75, 96)              | 0.460   |
| Baseline blood glucose, median (IQR), mmol/L | 5.9 (5.1, 7.5)      | 5.6 (5.0, 6.8)           | 0.255   |
| Onset-to-needle time, median (IQR), hours    | 4 (2, 4)            | 3 (2, 4)                 | 0.549   |
| Baseline NIHSS score, median (IQR)           | 5 (3,6)             | 5 (3, 8)                 | 0.369   |
| NIHSS score at discharge, median (IQR)       | 6 (3, 8)            | 3 (1, 4)                 | <0.001  |
| Hospital stay, median (IQR), days            | 12 (9, 15)          | 10 (8, 12)               | 0.018   |
| Infarct site                                 |                     |                          |         |
| The lenticulostriate artery, n (%)           | 26 (74.3)           | 70 (70.0)                | 0.630   |
| The paramedian pontine artery, n (%)         | 9 (25.7)            | 30 (30.0)                | 0.630   |
| Intravenous thrombolysis, n (%)              | 8 (22.9)            | 43(43.0)                 | 0.034   |
| Dual-antiplatelet treatment, n (%)           | 32 (91.4)           | 95 (95.0)                | 0.427   |
| mRS scores at 3 months, median, IQR          | 2 (2, 4)            | 1 (0, 2)                 | <0.001  |

Abbreviations: SD, standard deviation; IQR, interquartile range; NIHSS, National Institutes of Health Stroke Scale; mRS, Modified Rankin Scale score; END, early neurological deterioration; SBP, systolic blood pressure; DBP, diastolic blood pressure.
